# Supplementary material
Source: HighWire-hosted journal article supplement (https://cmaj.ca/highwire/filestream/57916/field_highwire_adjunct_files/0/April_28_editorial_correction.pdf)
Supplement: April_28_editorial_correction.pdf [file April_28_editorial_correction.pdf]

## **CORRECTION**

In the April 28 editorial,<sup>1</sup> we stated that the Canada Health Act is 24 years old. In fact, it received Royal Assent and came into effect on April 1, 1984, 25 years ago.<sup>2</sup>

## **REFERENCES**

1. Hébert PC. An open letter to the minister of health. *CMAJ* 2009;180(9):903.
2. Madore O. The Canada Health Act: overview and options. Ottawa; The Library of Parliament: 2005. Available: [www.parl.gc.ca/information/library/PRBpubs/944-e.htm](http://www.parl.gc.ca/information/library/PRBpubs/944-e.htm) (accessed 2009 Apr.29).
